# Supplementary material for: Association of Light Exposure on Physical Activity and Sedentary Time in Young People
Source: Int J Environ Res Public Health. 2015 Mar 10;12(3):2941–9. doi: 10.3390/ijerph120302941 (PMC4377944; doi:10.3390/ijerph120302941)
Supplement: Supplementary File 1 [file ijerph-12-02941-s001.pdf]

# Association of Light Exposure on Physical Activity and Sedentary Time in Young People

**Table S1.** Association between average daily, weekday and weekend light exposure (Log Lux) and time spent sedentary and in MVPA (min/day).

|                   | <b>Model 1</b>                             | <b>Model 2</b>                             |
|-------------------|--------------------------------------------|--------------------------------------------|
|                   | <b>B Coefficient <sup>†</sup> (95% CI)</b> | <b>B Coefficient <sup>†</sup> (95% CI)</b> |
| MVPA              |                                            |                                            |
| Daily (n = 228)   | 5.3 (3.0, 7.6) **                          | 3.6 (1.2, 6.0) **                          |
| Weekday (n = 226) | 4.1 (1.7, 6.5) **                          | 1.8 (−0.7, 4.4)                            |
| Weekend (n = 153) | 4.8 (2.7, 6.8) **                          | 3.7 (1.6, 5.9) **                          |
| Sedentary time    |                                            |                                            |
| Daily (n = 228)   | −13.6 (−21.2, −6.0) **                     | −11.0 (−18.9, −3.0) **                     |
| Weekday (n = 226) | −15.8 (−23.7, −8.0) **                     | −14.8 (−22.9, −6.7) **                     |
| Weekend (n = 153) | −12.1 (−19.5, −4.8) **                     | −8.4 (−16.2, −0.5)*                        |

Subjects with lux vales <1 were excluded from this analysis. \*\*  $p < 0.01$ , \*  $p < 0.05$ ; <sup>†</sup> coefficient reflects minutes/day of MVPA or sedentary time per unit increase in LUX; *Model 1* adjusted for age, sex and device wear time. *Model 2* additionally adjusted for ethnic group, school, body fat and daily MVPA or daily sedentary time.
